# Supplementary material for: Cost–Utility and Budget Impact Analysis for Stopping the Inappropriate Use of Proton Pump Inhibitors After Cessation of NSAID or Low-Dose Acetylsalicylic Acid Treatment
Source: Springer Nature journal article supplement (doi:10.1007/s40266-019-00713-5), 2019-09-27
Supplement: MOESM1 [file 17217480]

**Electronic Supplementary Material**

# A cost-utility and budget impact analysis for stopping the inappropriate use of proton pomp inhibitors after cessation of NSAID or low-dose acetylsalicylic acid treatment

# Running head: CUA and BIA for stopping inappropriate PPI use after NSAID or LDASA cessation

Sek Hung **Chau** MSc1* , Reinier Luuk **Sluiter** MSc2*, dr. Jacqueline Geertruida **Hugtenburg**1, prof. dr. Michel **Wensing**3,4, dr. Wietske **Kievit**2, dr. Martina **Teichert**5

*1 Amsterdam UMC, Vrije Universiteit Amsterdam, department of Clinical Pharmacology and Pharmacy, Amsterdam Public Health research institute, De Boelelaan 1117, Amsterdam, the Netherlands*

*2 Radboud University Medical Center, department for Health Evidence, Geert Grooteplein 21, Nijmegen, the Netherlands*

*3 Radboud University Medical Center, Scientific Institute for Quality of Healthcare (IQ healthcare), Geert Grooteplein 21, Nijmegen, the Netherlands*

*4 Heidelberg University, department of General Practice and Health Services Research, Im Neuenheimer Feld 130.3, Heidelberg, Germany*

*5 Leiden University Medical Center, department of Clinical Pharmacy & Toxicology,* *Albinusdreef 2, Leiden, the Netherlands*

* S.H. Chau and R.L. Sluiter contributed equally to this work.

*Corresponding author*
S.H. Chau

Amsterdam UMC, Vrije Universiteit Amsterdam

Department of Clinical Pharmacology and Pharmacy

De Boelelaan 1117

1081 HV Amsterdam

the Netherlands.

Postal address:

Postbus 7057, Room ZH 0 D 172

1007 MB Amsterdam

**Model parameters as used in the Markov model**

| Parameter (3-month cycles) | Probability | 95% CI |  | Reference |
| --- | --- | --- | --- | --- |
| **Strategy dependent (proton pump inhibitors (PPI) use)** |  |  |  |  |
| Probability to develop gastro-intestinal (GI) bleeding | *Age and cycle dependent* |  |  | [50] |
|  |  |  |  |  |
| Probability of post-GI bleeding | 0.10 | 0.07 | 0.17 | [32] |
| Probability of community acquired pneumonia (CAP) due to PPI use | *Age and cycle dependent* |  |  | [50] |
| Probability of hip fracture due to PPI use | *Age and cycle dependent* |  |  | [50] |
|  |  |  |  |  |
| Probability of PPI compliance | 0.68 | 0.2 | 1 | [32] |
|  |  |  |  |  |
| Risk ratio for CAP due to PPI use | 1.89 | 1.36 | 2.62 | [25] |
| Risk ratio for hip fracture due to PPI use (after one year) | 1.44 | 1.30 | 1.59 | [18] |
| Risk ratio for GI bleeding | 0.66 | 0.25 | 0.75 | [51] |
|  |  |  |  |  |
| Costs for PPI use during 3 months | € 2.40 | € 2.00 | € 10.00 | [52] |
| Standard prescription costs | € 6.00 |  |  | [52] |
| First prescription costs | € 12.00 |  |  | [52] |
| Consultations costs stopping PPI | € 103.00 |  |  | *Assumption* |
|  |  |  |  |  |
| **Strategy independent (general rate)** |  |  |  |  |
|  | *Age and cycle dependent* |  |  | [50] |
| Probability to death of GI-bleeding | 0.02 | 0.010 | 0.037 | [32] |
| Probability of death due to hip fracture | 0.25 | 0.15 | 0.35 | [53] |
|  |  |  |  |  |
| Probability of GI-bleeding | *Age and cycle dependent* |  |  | [50] |
|  |  |  |  |  |
| Probability of(re) bleeding | (2*PPI) = 0.2 |  |  | *Assumption* |
|  |  |  |  |  |
| Utility for GI-bleeding | 0.94 | 0.88 | 0.97 | [33] |
| Utility post-GI bleeding | 0.98 | 0.95 | 1 | [33] |
| Utility no hip fracture; adults (>17 years of age), men and postmenopausal women suffering primary or secondary osteoporosis; | 0.99 | 0.95 | 1 | [43] |
| Disutility 1 year after hip fracture; adults (>17 years of age), men and postmenopausal women suffering primary or secondary osteoporosis; | 0.23 | 0.15 | 0.31 | [43] |
| Utility for CAP | 0.9 | 0.87 | 0.95 | *Assumption* |
|  |  |  |  |  |
| Costs embolization/surgery | € 1,329.47 | € 600.00 | € 2,000.00 | [32] |
| Costs for blood transfusion | € 405.35 | € 200.00 | € 600.00 | [32] |
| Costs for diagnostic endoscopy | € 343.79 | € 175.00 | € 525.00 | [32] |
| Costs for 10d hospital admission | € 4.570.00 | € 2,000.00 | € 6,000.00 | [32] |
| Costs Helicobacter pylori (HPI) test | € 3.50 | € 2.00 | € 5.00 | [32] |
| Costs Helicobacter pylori breathing test | € 63.92 | € 30.00 | € 90.00 | [32] |
| Costs intravenous PPI | € 163.61 | € 100.00 | € 200.00 | [32] |
| Costs for therapeutic endoscopy | € 850.00 | € 350.00 | € 1,200.00 | [32] |
| Costs for triple therapy | € 64.89 | € 40.00 | € 90.00 | [52] |
| Costs for acetaminophen/paracetamol | € 10.80 | € 7.50 | € 15.00 | [52] |
| Costs for pneumonia | € 3,899.00 | € 2,911.00 | € 5,684.00 | [40] |
| Costs for hip fracture | € 21,000.00 | € 15,000.00 | € 25,000.00 | [41] |
|  |  |  |  |  |
| Chance of embolization/surgery | 0.09 | 0.02 | 0.22 | [32] |
| Chance to rebleed within 3 months | 0.067 | 0.05 | 0.09 | [32] |
| Chance for ulcus ventriculi | 0.18 | 0.11 | 0.24 | [32] |
| Chance of need for blood transfusion | 0.60 | 0.20 | 0.90 | [32] |
| Chance of HPI positive | 0.48 | 0.42 | 0.92 | [32] |
